# Supplementary material for: A system level analysis of gastric cancer across tumor stages with RNA-seq data
Source: Royal Society of Chemistry journal article supplement (doi:10.1039/c5mb00105f), 2015-04-17
Supplement: c5mb00105f1.xlsx [file c5mb00105f1.xlsx]

## Sheet: Stage I up-regulated
Enriched biological process terms in up-regulated genes for Stage I
Term	Count	P-values
cell cycle process	153	1.11555e-51
mitotic cell cycle	133	3.68869e-51
cell cycle	175	3.68869e-51
nuclear division	94	1.97899e-42
organelle fission	94	2.55186e-40
cell division	106	7.1937e-38
mitosis	74	1.66197e-35
cell cycle phase transition	70	2.16366e-25
mitotic cell cycle phase transition	69	4.46992e-25
cellular component organization or biogenesis	268	2.7495e-22
single-organism organelle organization	134	5.18856e-21
chromosome segregation	39	5.9268e-21
cellular component organization	260	1.37126e-20
organelle organization	168	3.77681e-18
DNA replication	48	3.77865e-18
DNA metabolic process	88	2.3092e-17
regulation of cell cycle	76	2.81658e-16
regulation of cell cycle process	56	2.91023e-16
sister chromatid segregation	23	4.89826e-16
microtubule-based process	58	8.43733e-16
microtubule cytoskeleton organization	46	1.57059e-15
chromosome organization	75	3.31592e-15
mitotic sister chromatid segregation	21	4.48649e-15
extracellular matrix organization	49	5.18433e-15
extracellular structure organization	49	5.5807e-15
DNA-dependent DNA replication	28	8.22508e-15
G1/S transition of mitotic cell cycle	38	3.75716e-14
regulation of cell division	36	2.38419e-13
DNA strand elongation involved in DNA replication	16	3.03596e-13
DNA strand elongation	16	1.56483e-12
collagen fibril organization	16	4.17331e-12
regulation of mitotic cell cycle	43	1.36752e-11
extracellular matrix disassembly	25	1.8556e-11
cell proliferation	112	1.8567e-11
regulation of nuclear division	26	1.8567e-11
spindle organization	21	1.27821e-10
DNA recombination	33	1.4668e-10
cell cycle phase	15	1.63817e-10
regulation of transcription involved in G1/S transition of mitotic cell cycle	12	5.90202e-10
regulation of mitosis	22	7.50588e-10
collagen catabolic process	18	2.25017e-09
cell cycle checkpoint	31	2.6373e-09
DNA repair	43	3.43804e-09
meiotic nuclear division	26	4.1079e-09
mitotic recombination	13	5.39464e-09
cellular response to DNA damage stimulus	57	9.55572e-09
multicellular organismal catabolic process	18	9.96501e-09
meiotic cell cycle	26	1.25002e-08
cellular component movement	96	1.95584e-08
single-organism cellular process	413	2.3682e-08
DNA conformation change	28	2.6408e-08
regulation of microtubule cytoskeleton organization	18	4.68485e-08
centrosome organization	16	4.97213e-08
collagen metabolic process	20	5.12665e-08
cytoskeleton organization	64	6.61459e-08
nucleic acid metabolic process	214	6.64519e-08
DNA replication initiation	11	7.19556e-08
G2/M transition of mitotic cell cycle	24	9.36946e-08
cell cycle G2/M phase transition	24	9.36946e-08
double-strand break repair	21	1.00672e-07
microtubule organizing center organization	16	1.05413e-07
multicellular organismal macromolecule metabolic process	20	1.16374e-07
multicellular organismal metabolic process	21	1.28105e-07
regulation of microtubule-based process	19	1.28742e-07
organ development	132	3.56505e-07
metaphase/anaphase transition of mitotic cell cycle	12	5.98985e-07
anatomical structure morphogenesis	119	6.95499e-07
regulation of chromosome segregation	10	7.11284e-07
metaphase/anaphase transition of cell cycle	12	7.64509e-07
anatomical structure development	193	8.78151e-07
negative regulation of cell cycle process	27	1.05868e-06
regulation of mitotic cell cycle phase transition	27	1.25138e-06
centrosome cycle	12	1.25554e-06
negative regulation of nuclear division	13	1.84564e-06
regulation of cell cycle phase transition	27	1.87214e-06
mitotic spindle organization	11	1.89298e-06
cell cycle DNA replication	11	1.89298e-06
chromosome condensation	10	1.89298e-06
nuclear cell cycle DNA replication	10	1.89298e-06
cellular process involved in reproduction	39	1.91158e-06
telomere maintenance via semi-conservative replication	9	2.01829e-06
developmental process	218	2.34495e-06
single-organism process	440	2.39276e-06
mitotic chromosome condensation	7	3.17769e-06
attachment of spindle microtubules to kinetochore	8	3.87287e-06
telomere maintenance via recombination	9	4.28308e-06
cellular component disassembly	37	4.80012e-06
mitotic G2 phase	6	4.92673e-06
G2 phase	6	4.92673e-06
M phase	8	5.92118e-06
skeletal system development	36	6.33354e-06
double-strand break repair via homologous recombination	13	6.43367e-06
negative regulation of mitotic cell cycle phase transition	22	6.43367e-06
telomere maintenance	13	7.5798e-06
recombinational repair	13	7.5798e-06
chordate embryonic development	44	8.31498e-06
telomere organization	13	8.97053e-06
negative regulation of cell cycle phase transition	22	9.00547e-06
mitotic M phase	5	1.02752e-05
embryo development ending in birth or egg hatching	44	1.06825e-05
regulation of organelle organization	48	1.17051e-05
regulation of mitotic metaphase/anaphase transition	11	1.18295e-05
interphase	8	1.22716e-05
mitotic interphase	8	1.22716e-05
multicellular organismal development	192	1.234e-05
macromolecule metabolic process	308	1.37676e-05
regulation of metaphase/anaphase transition of cell cycle	11	1.41998e-05
single-organism developmental process	212	1.46136e-05
anatomical structure formation involved in morphogenesis	58	1.80382e-05
cellular process	470	1.86632e-05
DNA biosynthetic process	10	1.97215e-05
cell migration	61	2.04636e-05
negative regulation of biological process	161	2.11716e-05
telomere maintenance via telomere lengthening	10	2.46562e-05
DNA integrity checkpoint	19	2.68442e-05
embryo development	61	2.80495e-05
system development	163	2.91293e-05
regulation of cellular component organization	84	2.98195e-05
cell motility	64	3.02012e-05
locomotion	78	3.82446e-05
organ morphogenesis	53	4.69738e-05
positive regulation of cell cycle process	22	5.47897e-05
DNA duplex unwinding	10	7.16686e-05
DNA unwinding involved in DNA replication	5	7.24674e-05
nucleobase-containing compound metabolic process	231	8.99154e-05
regulation of cell proliferation	73	0.000103783
DNA geometric change	10	0.000104162
negative regulation of mitosis	10	0.000104162
cellular response to stress	75	0.000106063
regulation of centrosome cycle	7	0.000110581
negative regulation of cellular process	146	0.000119643
spindle checkpoint	10	0.00012321
negative regulation of mitotic metaphase/anaphase transition	9	0.000127273
spindle assembly checkpoint	9	0.000127273
regulation of organ morphogenesis	18	0.000130718
regulation of attachment of spindle microtubules to kinetochore	5	0.000144635
DNA packaging	18	0.000154522
negative regulation of metaphase/anaphase transition of cell cycle	9	0.000154858
mitotic cell cycle checkpoint	18	0.000166605
heterocycle metabolic process	235	0.000174201
embryonic organ development	31	0.000238095
cellular macromolecule metabolic process	276	0.000266922
cytokinesis	15	0.000326808
response to ionizing radiation	15	0.000326808
G2 DNA damage checkpoint	8	0.000352696
blood vessel development	32	0.000364989
microtubule-based movement	18	0.000370723
cellular aromatic compound metabolic process	233	0.000442307
cell development	85	0.00044995
microtubule polymerization or depolymerization	10	0.00044995
DNA replication checkpoint	5	0.000452128
cardiovascular system development	46	0.000454709
circulatory system development	46	0.000454709
protein localization to chromosome	7	0.000454709
vasculature development	38	0.000454709
regulation of DNA metabolic process	22	0.000470251
microtubule anchoring	8	0.000512337
localization of cell	45	0.000549378
artery morphogenesis	9	0.000652279
mitotic cytokinesis	6	0.00066788
regulation of organ formation	8	0.000757293
mitotic spindle assembly checkpoint	8	0.000757293
kidney development	20	0.000829204
organic cyclic compound metabolic process	238	0.000873409
organ regeneration	9	0.000885702
cellular nitrogen compound metabolic process	238	0.000909549
specification of organ identity	7	0.000919069
cell morphogenesis involved in differentiation	46	0.00094364

## Sheet: Stage II up-regulated
Enriched biological process terms in up-regulated genes for Stage II
Term	Count	P-values
mitotic cell cycle	111	2.09325e-31
extracellular matrix organization	70	1.19317e-29
extracellular structure organization	70	1.19317e-29
cell cycle process	123	1.77358e-28
cell cycle	142	4.44142e-27
nuclear division	73	1.43692e-23
organelle fission	73	4.38923e-22
cell division	86	7.17303e-22
mitosis	58	1.62974e-20
cellular component organization or biogenesis	269	1.07753e-18
cellular component organization	265	1.26098e-18
extracellular matrix disassembly	33	2.56652e-18
cell cycle phase transition	60	4.5665e-17
collagen fibril organization	20	5.27828e-17
anatomical structure morphogenesis	154	7.43072e-17
mitotic cell cycle phase transition	59	8.12615e-17
collagen catabolic process	25	3.34946e-16
cellular component movement	119	8.96797e-16
collagen metabolic process	29	1.88878e-15
multicellular organismal catabolic process	25	3.40771e-15
single-organism cellular process	451	4.40362e-15
multicellular organismal macromolecule metabolic process	29	7.62726e-15
anatomical structure development	230	1.33032e-14
cell proliferation	124	1.57706e-14
multicellular organismal metabolic process	30	1.57706e-14
system development	203	8.48105e-14
cell migration	84	2.366e-13
single-organism process	479	3.0777e-13
chromosome segregation	31	4.2552e-13
developmental process	254	4.73524e-13
cell motility	87	8.60802e-13
skeletal system development	50	1.59335e-12
vasculature development	58	4.50913e-12
locomotion	102	5.47172e-12
multicellular organismal development	226	7.54828e-12
cell adhesion	83	7.54828e-12
biological adhesion	83	9.1554e-12
single-organism developmental process	247	1.30541e-11
cardiovascular system development	67	1.51796e-11
circulatory system development	67	1.51796e-11
G1/S transition of mitotic cell cycle	35	2.19631e-11
DNA replication	39	3.73672e-11
regulation of cell cycle process	48	1.04605e-10
regulation of cell division	33	1.21272e-10
single-multicellular organism process	271	1.23028e-10
organ development	149	1.38306e-10
blood vessel development	47	1.42154e-10
multicellular organismal process	278	1.88165e-10
regulation of cell motility	51	2.59925e-10
regulation of cell cycle	65	6.38162e-10
cellular component disassembly	46	7.40522e-10
regulation of cell migration	48	1.4314e-09
regulation of nuclear division	24	1.8923e-09
regulation of anatomical structure morphogenesis	60	1.89663e-09
regulation of cellular component movement	53	1.89663e-09
negative regulation of biological process	185	1.89663e-09
anatomical structure formation involved in morphogenesis	71	1.95552e-09
sister chromatid segregation	17	2.80463e-09
blood vessel morphogenesis	40	4.12358e-09
regulation of cellular component organization	100	5.05956e-09
regulation of locomotion	51	5.61305e-09
regulation of mitosis	21	9.45423e-09
regulation of mitotic cell cycle	39	9.45423e-09
single-organism organelle organization	107	9.45423e-09
regulation of cell proliferation	89	9.93496e-09
organ morphogenesis	65	1.01535e-08
regulation of multicellular organismal development	87	1.17012e-08
DNA metabolic process	71	1.26651e-08
tissue morphogenesis	47	1.87487e-08
mitotic sister chromatid segregation	15	2.96842e-08
regulation of developmental process	104	5.02668e-08
response to stimulus	310	5.31169e-08
localization of cell	58	5.32342e-08
angiogenesis	39	7.71792e-08
response to chemical	165	9.73018e-08
negative regulation of cellular process	166	1.06153e-07
DNA-dependent DNA replication	20	1.40983e-07
cell morphogenesis involved in differentiation	59	1.47983e-07
tissue development	91	1.48541e-07
embryo development	70	1.58515e-07
microtubule-based process	44	1.6035e-07
cell development	101	2.50385e-07
regulation of transcription involved in G1/S transition of mitotic cell cycle	10	2.66357e-07
connective tissue development	27	4.17701e-07
microtubule cytoskeleton organization	33	5.81807e-07
regulation of multicellular organismal process	114	5.84607e-07
chordate embryonic development	48	7.59014e-07
regulation of localization	97	9.40156e-07
embryo development ending in birth or egg hatching	48	1.02941e-06
regulation of organ morphogenesis	22	1.08397e-06
kidney development	26	1.45888e-06
cellular process	495	1.45888e-06
cell cycle checkpoint	27	1.45888e-06
cell differentiation	155	1.85687e-06
positive regulation of cell proliferation	55	2.05501e-06
cell morphogenesis	70	2.10808e-06
tube development	40	2.15874e-06
cartilage development	23	2.27459e-06
response to stress	163	2.33609e-06
response to acid	29	2.33671e-06
positive regulation of cell migration	29	2.33671e-06
negative regulation of cell-substrate adhesion	11	2.49617e-06
urogenital system development	30	2.51919e-06
organelle organization	136	2.54477e-06
positive regulation of cell motility	29	3.63233e-06
positive regulation of biological process	190	3.63233e-06
morphogenesis of an epithelium	36	3.70332e-06
cellular response to stimulus	248	3.74614e-06
positive regulation of cellular process	173	3.75351e-06
cellular component morphogenesis	72	4.10248e-06
biological regulation	373	5.49716e-06
positive regulation of cellular component movement	29	5.49716e-06
response to organic substance	120	5.574e-06
DNA strand elongation involved in DNA replication	10	5.87738e-06
metaphase/anaphase transition of mitotic cell cycle	11	6.70346e-06
cellular response to acid	19	8.05717e-06
metaphase/anaphase transition of cell cycle	11	8.5144e-06
positive regulation of locomotion	29	9.55623e-06
cell-substrate adhesion	26	9.55623e-06
cellular developmental process	159	9.58751e-06
canonical Wnt signaling pathway	23	1.00784e-05
chromosome organization	55	1.01705e-05
DNA strand elongation	10	1.3181e-05
response to growth factor	48	1.52917e-05
chemotaxis	47	1.77633e-05
taxis	47	1.77633e-05
positive regulation of macromolecule metabolic process	110	2.50609e-05
response to oxygen-containing compound	71	2.54177e-05
negative regulation of developmental process	46	3.52667e-05
cell cycle phase	10	3.54459e-05
embryonic organ development	34	3.55807e-05
DNA conformation change	23	3.80776e-05
cellular response to growth factor stimulus	46	3.90828e-05
response to endogenous stimulus	75	3.97877e-05
G2/M transition of mitotic cell cycle	20	4.63285e-05
cell cycle G2/M phase transition	20	4.63285e-05
regulation of cellular process	336	4.71405e-05
cellular response to endogenous stimulus	57	4.80838e-05
epithelium development	51	4.86848e-05
positive regulation of metabolic process	117	5.02787e-05
response to wounding	71	5.12677e-05
regulation of canonical Wnt signaling pathway	18	5.34988e-05
response to lipid	45	5.6042e-05
DNA recombination	24	5.70642e-05
regulation of biological process	351	5.78012e-05
renal system development	25	5.93844e-05
cellular response to organic substance	91	6.276e-05
regulation of cell adhesion	28	6.46712e-05
attachment of spindle microtubules to kinetochore	7	6.46712e-05
cell chemotaxis	21	6.58402e-05
Wnt signaling pathway	29	7.54342e-05
regulation of mitotic cell cycle phase transition	24	7.88972e-05
regulation of chemotaxis	16	8.31065e-05
cellular response to chemical stimulus	108	9.59895e-05
positive regulation of cell cycle process	22	9.94566e-05
regulation of chromosome segregation	8	0.000101147
negative regulation of nuclear division	11	0.000101675
cellular response to oxygen-containing compound	49	0.000102451
regulation of cell cycle phase transition	24	0.000108782
regulation of mitotic metaphase/anaphase transition	10	0.000110413
heart development	33	0.000124182
lung development	19	0.000128669
artery morphogenesis	10	0.000131912
regulation of metaphase/anaphase transition of cell cycle	10	0.000131912
regulation of Wnt signaling pathway	21	0.00013796
meiotic nuclear division	19	0.000150099
positive regulation of developmental process	52	0.000154481
transmembrane receptor protein serine/threonine kinase signaling pathway	26	0.000154481
spindle checkpoint	10	0.000154481
mitotic G2 phase	5	0.000154481
G2 phase	5	0.000154481
spindle assembly checkpoint	9	0.000155213
respiratory tube development	19	0.000157285
nephron development	13	0.000158902
negative regulation of cell cycle process	23	0.000196323
regulation of cell-substrate adhesion	16	0.000212555
negative regulation of angiogenesis	11	0.000212555
regulation of transcription from RNA polymerase II promoter	77	0.000224386
cell differentiation involved in embryonic placenta development	7	0.000232223
heart morphogenesis	20	0.000237362
negative regulation of cell adhesion	14	0.000252014
double-strand break repair	16	0.000252601
positive regulation of chemotaxis	13	0.000255578
wound healing	44	0.000260859
negative regulation of biosynthetic process	66	0.000272184
muscle cell migration	9	0.000275391
double-strand break repair via homologous recombination	11	0.000276546
regulation of microtubule cytoskeleton organization	13	0.000280113
morphogenesis of a branching structure	21	0.000280113
cellular response to transforming growth factor beta stimulus	21	0.000280113
meiotic cell cycle	19	0.000280721
glomerulus development	10	0.000287687
response to transforming growth factor beta	21	0.000294586
response to retinoic acid	14	0.000294586
positive regulation of behavior	14	0.000294586
negative regulation of cellular biosynthetic process	65	0.000300906
spindle organization	13	0.000304739
recombinational repair	11	0.000304739
cell surface receptor signaling pathway	128	0.000333812
morphogenesis of a branching epithelium	20	0.000367354
cardiac ventricle development	13	0.00038157
artery development	10	0.000385539
DNA replication checkpoint	5	0.000450424
positive regulation of gene expression	67	0.000463648
negative regulation of cellular component organization	32	0.000463648
protein localization to chromosome	7	0.000494781
leukocyte migration	25	0.000510216
positive regulation of cellular metabolic process	107	0.000529296
response to abiotic stimulus	56	0.000530493
DNA duplex unwinding	9	0.000533001
cellular response to lipid	23	0.000541647
embryonic morphogenesis	37	0.000554101
mitotic recombination	8	0.000562724
microtubule anchoring	8	0.000562724
gland development	24	0.000580238
respiratory system development	19	0.000587139
cellular response to DNA damage stimulus	45	0.000587139
regulation of organelle organization	44	0.000587139
tube morphogenesis	26	0.000604448
epithelial tube morphogenesis	25	0.000641732
cellular response to stress	74	0.000664045
DNA geometric change	9	0.000716023
negative regulation of mitosis	9	0.000716023
cytoskeleton organization	53	0.000716023
response to external stimulus	95	0.000793873
mitotic spindle assembly checkpoint	8	0.000810368
cellular process involved in reproduction	33	0.000816358
negative regulation of response to stimulus	58	0.000820746
regulation of behavior	17	0.000828295
negative regulation of macromolecule biosynthetic process	61	0.000848016
ossification	25	0.000856536
cardiac ventricle morphogenesis	10	0.000856536
epithelial cell proliferation	24	0.000856536
DNA replication initiation	7	0.000944591
mitotic spindle organization	8	0.000947104
negative regulation of mitotic metaphase/anaphase transition	8	0.000947104
organ regeneration	9	0.000950005
regulation of response to stimulus	134	0.000962269

## Sheet: Stage IIII up-regulated
Enriched BPs in up-regulated genes for Stage III
Term	Count	P-values
mitotic cell cycle	108	4.7986e-30
cell cycle process	123	5.791e-29
extracellular matrix organization	66	8.00579e-27
extracellular structure organization	66	8.00579e-27
cell cycle	140	8.00579e-27
nuclear division	73	4.71949e-24
cell division	88	1.14056e-23
organelle fission	73	1.28451e-22
mitosis	59	1.07977e-21
cellular component organization or biogenesis	269	4.02247e-20
cellular component organization	265	5.0081e-20
cell cycle phase transition	59	9.95347e-17
extracellular matrix disassembly	31	1.66578e-16
mitotic cell cycle phase transition	58	1.89274e-16
collagen fibril organization	19	1.03409e-15
single-organism cellular process	443	1.32693e-14
anatomical structure morphogenesis	145	4.76449e-14
cell proliferation	120	2.35524e-13
collagen catabolic process	22	5.39619e-13
single-organism process	471	5.39619e-13
anatomical structure development	222	5.76852e-13
collagen metabolic process	26	9.86643e-13
cellular component movement	110	1.34775e-12
chromosome segregation	30	2.32039e-12
vasculature development	58	2.75449e-12
multicellular organismal macromolecule metabolic process	26	3.14143e-12
multicellular organismal catabolic process	22	3.14143e-12
multicellular organismal metabolic process	27	5.29993e-12
developmental process	246	1.08114e-11
regulation of cell cycle process	49	2.01519e-11
single-organism organelle organization	113	4.35445e-11
system development	191	6.73645e-11
cell migration	77	1.31303e-10
negative regulation of biological process	187	1.38362e-10
cell adhesion	79	1.74993e-10
locomotion	97	1.74993e-10
biological adhesion	79	2.08489e-10
single-organism developmental process	239	2.54078e-10
cell motility	80	3.31983e-10
blood vessel development	46	3.39854e-10
regulation of cell cycle	65	3.54073e-10
DNA replication	37	4.58534e-10
cardiovascular system development	63	5.55963e-10
circulatory system development	63	5.55963e-10
DNA metabolic process	73	1.21434e-09
regulation of cell motility	49	1.73285e-09
regulation of cell division	31	1.8814e-09
multicellular organismal development	214	2.01584e-09
microtubule cytoskeleton organization	37	2.87424e-09
organ development	142	4.99589e-09
regulation of developmental process	106	5.10864e-09
negative regulation of cellular process	169	5.10864e-09
cellular component disassembly	44	5.10864e-09
G1/S transition of mitotic cell cycle	31	6.50477e-09
regulation of cell migration	46	8.6249e-09
blood vessel morphogenesis	39	9.74827e-09
regulation of cellular component organization	98	9.75544e-09
microtubule-based process	46	1.24817e-08
regulation of multicellular organismal development	86	1.24817e-08
cell morphogenesis involved in differentiation	61	1.32728e-08
sister chromatid segregation	16	2.12027e-08
regulation of mitotic cell cycle	38	2.17683e-08
regulation of cellular component movement	50	2.71611e-08
regulation of locomotion	49	2.81993e-08
regulation of nuclear division	22	4.39202e-08
regulation of mitosis	20	4.54452e-08
skeletal system development	41	6.31974e-08
cell cycle checkpoint	29	7.75489e-08
regulation of cell proliferation	85	1.04022e-07
tissue morphogenesis	45	1.04022e-07
anatomical structure formation involved in morphogenesis	65	2.1884e-07
cell development	100	2.25668e-07
mitotic sister chromatid segregation	14	2.35095e-07
single-multicellular organism process	253	2.99238e-07
tissue development	89	2.99238e-07
regulation of anatomical structure morphogenesis	54	3.49246e-07
multicellular organismal process	260	3.97006e-07
organ morphogenesis	60	5.06016e-07
angiogenesis	37	5.10255e-07
cell morphogenesis	71	5.41464e-07
cellular component morphogenesis	74	5.47089e-07
DNA-dependent DNA replication	19	6.06851e-07
double-strand break repair	20	7.58002e-07
response to stimulus	300	7.72116e-07
chemotaxis	50	8.9524e-07
taxis	50	8.9524e-07
localization of cell	54	1.15883e-06
response to chemical	158	1.33379e-06
cell differentiation	152	3.07804e-06
organelle organization	134	3.11017e-06
centrosome organization	14	3.34977e-06
positive regulation of cellular process	171	3.37358e-06
tube development	39	4.12465e-06
negative regulation of developmental process	48	4.65566e-06
regulation of multicellular organismal process	109	5.06851e-06
cellular developmental process	158	5.96426e-06
microtubule organizing center organization	14	6.63543e-06
regulation of mitotic cell cycle phase transition	26	6.98574e-06
positive regulation of biological process	186	7.17593e-06
cellular process	485	7.17593e-06
morphogenesis of an epithelium	35	7.76757e-06
cell-substrate adhesion	26	7.93705e-06
embryo development	64	9.25704e-06
DNA conformation change	24	9.31589e-06
regulation of cell cycle phase transition	26	9.87759e-06
regulation of localization	92	1.0058e-05
regulation of centrosome cycle	8	1.04595e-05
regulation of microtubule cytoskeleton organization	15	1.2543e-05
DNA duplex unwinding	11	1.2543e-05
spindle organization	15	1.44406e-05
connective tissue development	24	1.46826e-05
chromosome organization	54	1.46826e-05
cellular response to stimulus	241	1.68381e-05
positive regulation of cell migration	27	1.81122e-05
negative regulation of cell cycle process	25	1.86453e-05
DNA geometric change	11	1.87722e-05
positive regulation of cell motility	27	2.74402e-05
positive regulation of cell proliferation	51	3.13974e-05
cell cycle phase	10	3.30302e-05
negative regulation of mitotic cell cycle phase transition	21	3.6481e-05
response to stress	155	3.84302e-05
G2/M transition of mitotic cell cycle	20	3.90869e-05
cell cycle G2/M phase transition	20	3.90869e-05
positive regulation of cellular component movement	27	3.94945e-05
chordate embryonic development	43	3.94945e-05
muscle cell migration	10	3.97133e-05
DNA recombination	24	4.76134e-05
negative regulation of cell cycle phase transition	21	4.90257e-05
metaphase/anaphase transition of mitotic cell cycle	10	4.90257e-05
embryo development ending in birth or egg hatching	43	4.99436e-05
double-strand break repair via homologous recombination	12	5.01715e-05
regulation of organ morphogenesis	19	5.24989e-05
cellular response to DNA damage stimulus	48	5.52623e-05
cell chemotaxis	21	5.58516e-05
recombinational repair	12	5.78948e-05
metaphase/anaphase transition of cell cycle	10	5.8372e-05
positive regulation of locomotion	27	6.21289e-05
attachment of spindle microtubules to kinetochore	7	6.2146e-05
negative regulation of cellular component organization	34	6.90001e-05
regulation of chemotaxis	16	7.24756e-05
DNA unwinding involved in DNA replication	5	7.86355e-05
DNA repair	34	7.92847e-05
biological regulation	361	8.14286e-05
cartilage development	20	8.36412e-05
centrosome cycle	10	8.46246e-05
negative regulation of nuclear division	11	9.23986e-05
regulation of chromosome segregation	8	9.42725e-05
regulation of mitotic metaphase/anaphase transition	10	0.000102156
regulation of microtubule-based process	15	0.000103344
positive regulation of developmental process	52	0.000103803
response to ionizing radiation	16	0.000105402
artery morphogenesis	10	0.000121077
regulation of metaphase/anaphase transition of cell cycle	10	0.000121077
kidney development	22	0.000130213
epithelium development	49	0.000132827
regulation of cell adhesion	27	0.000134786
DNA integrity checkpoint	18	0.000137274
spindle checkpoint	10	0.00014289
negative regulation of cell-substrate adhesion	9	0.000144774
spindle assembly checkpoint	9	0.000144774
regulation of biological process	343	0.000148774
mitotic G2 phase	5	0.000148774
G2 phase	5	0.000148774
regulation of canonical Wnt signaling pathway	17	0.000157136
regulation of cellular process	327	0.000192462
regulation of smooth muscle cell migration	8	0.000192534
chromosome condensation	8	0.000192534
cellular response to endogenous stimulus	54	0.00022137
negative regulation of cell adhesion	14	0.00022137
positive regulation of chemotaxis	13	0.000228115
regulation of DNA metabolic process	23	0.000228563
positive regulation of macromolecule metabolic process	104	0.000228563
positive regulation of cell cycle process	21	0.000235967
cellular response to stress	75	0.000251167
glomerulus development	10	0.00027102
cytoskeleton organization	54	0.000276963
regulation of double-strand break repair	7	0.000287111
sprouting angiogenesis	9	0.000305178
positive regulation of cell morphogenesis involved in differentiation	9	0.000305178
response to organic substance	110	0.000363041
urogenital system development	25	0.000363571
artery development	10	0.000367687
DNA strand elongation involved in DNA replication	8	0.000367687
G2 DNA damage checkpoint	8	0.000367687
regulation of transcription involved in G1/S transition of mitotic cell cycle	7	0.000370431
positive regulation of metabolic process	111	0.0003796
response to endogenous stimulus	70	0.000391515
meiotic nuclear division	18	0.000391515
response to growth factor	43	0.000427049
regulation of organelle organization	44	0.000439559
protein localization to chromosome	7	0.000476716
cellular response to chemical stimulus	103	0.000494869
tube morphogenesis	26	0.00050864
respiratory system development	19	0.000514573
smooth muscle cell migration	8	0.000541938
microtubule anchoring	8	0.000541938
positive regulation of epithelial to mesenchymal transition	7	0.000605844
nephron development	12	0.000617031
axon development	35	0.000655365
DNA strand elongation	8	0.000657685
morphogenesis of a branching structure	20	0.000678116
negative regulation of mitosis	9	0.000691689
mitotic cell cycle checkpoint	17	0.000691749
cellular response to organic substance	85	0.000711022
meiotic cell cycle	18	0.000732975
mitotic spindle assembly checkpoint	8	0.00078503
embryonic organ development	30	0.000799875
canonical Wnt signaling pathway	19	0.000802684
morphogenesis of a branching epithelium	19	0.000920602
mitotic spindle organization	8	0.000935884
negative regulation of mitotic metaphase/anaphase transition	8	0.000935884
negative regulation of angiogenesis	10	0.000938441
cellular response to growth factor stimulus	41	0.000962487
regulation of Wnt signaling pathway	19	0.000964396
negative regulation of cell differentiation	35	0.000999677

## Sheet: Stage IV up-regulated
Enriched biological process terms in up-regulated genes for Stage IV
Term	Count	P-values
extracellular matrix organization	58	1.77414e-28
extracellular structure organization	58	1.77414e-28
collagen fibril organization	19	4.52176e-18
cellular component organization	192	2.42989e-16
extracellular matrix disassembly	27	3.16257e-16
mitotic cell cycle	68	3.59964e-16
cellular component organization or biogenesis	193	6.21065e-16
cell cycle process	76	1.86467e-14
cell cycle	90	1.86467e-14
collagen metabolic process	24	4.24835e-14
cell division	58	4.51857e-14
cellular component movement	89	6.44575e-14
nuclear division	47	8.91835e-14
collagen catabolic process	20	8.91835e-14
multicellular organismal macromolecule metabolic process	24	1.00819e-13
multicellular organismal metabolic process	25	1.10618e-13
anatomical structure morphogenesis	110	2.71629e-13
developmental process	187	3.51838e-13
multicellular organismal catabolic process	20	4.50807e-13
organelle fission	47	5.32626e-13
anatomical structure development	166	6.68831e-13
cell adhesion	67	8.82702e-13
biological adhesion	67	1.02578e-12
system development	148	1.50419e-12
single-organism developmental process	183	2.5041e-12
single-organism cellular process	312	4.41849e-12
vasculature development	46	1.13078e-11
mitosis	36	2.8837e-11
blood vessel development	39	4.19776e-11
single-organism process	331	4.70181e-11
single-multicellular organism process	198	5.18956e-11
cardiovascular system development	52	6.82396e-11
circulatory system development	52	6.82396e-11
cell migration	61	9.39524e-11
locomotion	76	9.62201e-11
multicellular organismal process	202	1.24033e-10
multicellular organismal development	162	2.03523e-10
cell motility	63	2.74853e-10
regulation of cell motility	39	4.04652e-09
organ development	107	8.14028e-09
blood vessel morphogenesis	32	8.95388e-09
regulation of cell migration	37	1.19679e-08
cellular component disassembly	35	1.45629e-08
skeletal system development	34	2.52518e-08
regulation of locomotion	39	4.80801e-08
cell development	78	7.8112e-08
regulation of cellular component movement	39	1.11825e-07
angiogenesis	31	1.55373e-07
cell-substrate adhesion	24	1.96199e-07
anatomical structure formation involved in morphogenesis	51	2.30761e-07
cell proliferation	78	2.30761e-07
regulation of developmental process	77	2.41622e-07
chromosome segregation	19	4.5939e-07
cell morphogenesis involved in differentiation	45	5.32437e-07
cellular developmental process	121	7.14805e-07
cell morphogenesis	55	7.50704e-07
cellular component morphogenesis	57	9.04151e-07
cell differentiation	115	1.13327e-06
negative regulation of biological process	127	1.43028e-06
cell cycle phase transition	32	1.97875e-06
regulation of anatomical structure morphogenesis	41	2.31599e-06
regulation of cellular component organization	69	2.55485e-06
regulation of cell division	21	4.10519e-06
mitotic cell cycle phase transition	31	4.45112e-06
regulation of multicellular organismal development	60	5.09253e-06
response to stimulus	214	5.73944e-06
DNA replication	24	6.60517e-06
regulation of cell cycle process	30	9.00545e-06
kidney development	20	1.10091e-05
negative regulation of cellular process	115	1.30327e-05
response to chemical	114	1.45868e-05
organ morphogenesis	43	2.69661e-05
morphogenesis of a branching structure	19	2.80673e-05
tissue morphogenesis	31	3.85912e-05
chemotaxis	36	3.94379e-05
taxis	36	3.94379e-05
localization of cell	39	3.99276e-05
regulation of organ morphogenesis	16	4.55827e-05
morphogenesis of a branching epithelium	18	4.80773e-05
tube development	29	5.05275e-05
regulation of multicellular organismal process	79	5.06266e-05
microtubule-based process	30	5.06266e-05
single-organism organelle organization	70	5.35936e-05
regulation of cell proliferation	58	5.45505e-05
response to stress	114	6.30163e-05
morphogenesis of an epithelium	26	9.35327e-05
branching morphogenesis of an epithelial tube	16	0.000101508
sister chromatid segregation	10	0.000107451
regulation of nuclear division	14	0.000130413
negative regulation of cell-substrate adhesion	8	0.000132135
DNA metabolic process	45	0.000145637
regulation of cell cycle	39	0.000145637
regulation of localization	66	0.000162783
connective tissue development	18	0.000163532
urogenital system development	21	0.00017097
nephron development	11	0.000182738
cell cycle phase	8	0.000182738
microtubule cytoskeleton organization	22	0.000200134
response to wounding	52	0.000211938
response to acid	20	0.000227752
sprouting angiogenesis	8	0.000255634
renal system development	19	0.000294231
response to endogenous stimulus	54	0.000296919
Wnt signaling pathway	22	0.000312854
tissue development	59	0.00033112
cellular process	337	0.000355316
regulation of mitosis	12	0.000380758
DNA recombination	18	0.000385346
G1/S transition of mitotic cell cycle	18	0.000405032
heart development	25	0.00040711
double-strand break repair	13	0.000416526
negative regulation of cell migration	14	0.000428538
response to organic substance	82	0.000430376
tube morphogenesis	21	0.00052223
canonical Wnt signaling pathway	16	0.000528428
negative regulation of cell motility	14	0.000560249
positive regulation of Wnt signaling pathway	10	0.000562144
cellular response to stimulus	168	0.000574219
DNA-dependent DNA replication	12	0.00059377
cellular response to acid	13	0.000630758
organelle organization	91	0.000661966
positive regulation of cell migration	19	0.000661966
tissue remodeling	13	0.000666192
embryo development	44	0.00068136
epithelial tube morphogenesis	20	0.00068136
negative regulation of locomotion	15	0.000736595
negative regulation of cellular component movement	14	0.000736595
biological regulation	253	0.000826288
patterning of blood vessels	7	0.000826288
endothelial cell migration	12	0.000833128
response to oxygen-containing compound	49	0.000833128
positive regulation of cell motility	19	0.000833128
glomerulus development	8	0.000966637
regulation of cell adhesion	20	0.000981923
cellular response to growth factor stimulus	32	0.000996879
regulation of mitotic cell cycle	22	0.000999861
