# Supplementary material for: A system level analysis of gastric cancer across tumor stages with RNA-seq data
Source: Royal Society of Chemistry journal article supplement (doi:10.1039/c5mb00105f), 2015-04-17
Supplement: c5mb00105f2.xlsx [file c5mb00105f2.xlsx]

## Sheet: Stage I down-regulated
Enriched biological process termss in down-regulated genes for Stage I
Term	Count	P-values
single-organism process	491	1.81007e-05
response to stimulus	323	1.81007e-05
respiratory electron transport chain	18	3.14588e-05
electron transport chain	18	3.25629e-05
response to inorganic substance	36	3.41053e-05
ion homeostasis	45	0.000347529
cation homeostasis	40	0.000686363
response to chemical	161	0.000716559
oxidation-reduction process	44	0.000803759

## Sheet: Stage II down-regulated
Enriched biological process terms in down-regulated genes for Stage II
Term	Count	P-values
small molecule metabolic process	145	1.09082e-06
digestion	19	3.85383e-06
oxidation-reduction process	46	3.85383e-06
single-organism metabolic process	207	2.87118e-05
single-organism cellular process	390	3.13796e-05
fatty acid metabolic process	31	3.13796e-05
lipid metabolic process	72	5.00663e-05
carboxylic acid metabolic process	59	5.29187e-05
single-organism process	421	8.71573e-05
monocarboxylic acid metabolic process	37	8.71573e-05
cellular lipid metabolic process	57	8.71573e-05
xenobiotic metabolic process	19	0.000140498
cellular response to xenobiotic stimulus	19	0.000143561
response to xenobiotic stimulus	19	0.000179856
regulation of biological quality	133	0.000187574
unsaturated fatty acid metabolic process	15	0.000187574
icosanoid metabolic process	14	0.000187574
fatty acid derivative metabolic process	14	0.000187574
organic acid metabolic process	62	0.000187574
oxoacid metabolic process	61	0.000218964
response to chemical	142	0.000244958
long-chain fatty acid metabolic process	13	0.000358978
monovalent inorganic cation homeostasis	12	0.000586695
cellular response to chemical stimulus	100	0.000730192
icosanoid biosynthetic process	10	0.000844877
fatty acid derivative biosynthetic process	10	0.000844877
arachidonic acid metabolic process	10	0.000970643

## Sheet: Stage III down-regulated
Enriched biological process terms in down-regulated genes for Stage III
Term	Count	P-values
small molecule metabolic process	183	3.44645e-14
xenobiotic metabolic process	31	5.52076e-12
cellular response to xenobiotic stimulus	31	5.52076e-12
response to xenobiotic stimulus	31	7.24821e-12
oxidation-reduction process	59	5.53654e-11
single-organism metabolic process	248	6.41851e-10
cellular response to zinc ion	9	1.14083e-08
lipid metabolic process	88	2.83531e-08
respiratory electron transport chain	20	1.51063e-07
digestion	21	1.72748e-07
electron transport chain	20	1.7936e-07
carboxylic acid metabolic process	70	2.93829e-07
organic acid metabolic process	75	1.08595e-06
oxoacid metabolic process	74	1.14118e-06
cellular lipid metabolic process	67	1.19064e-06
response to zinc ion	12	1.24644e-06
fatty acid metabolic process	35	1.55066e-06
cellular response to cadmium ion	8	1.56549e-06
response to chemical	167	1.67314e-06
icosanoid metabolic process	17	3.48437e-06
fatty acid derivative metabolic process	17	3.48437e-06
response to inorganic substance	36	3.81571e-06
unsaturated fatty acid metabolic process	18	4.32943e-06
monocarboxylic acid metabolic process	42	5.06619e-06
arachidonic acid metabolic process	13	6.95052e-06
hydrogen ion transmembrane transport	14	9.18851e-06
regulation of biological quality	151	1.46281e-05
response to transition metal nanoparticle	15	1.70186e-05
cellular respiration	21	2.09409e-05
hydrogen transport	16	2.52396e-05
long-chain fatty acid metabolic process	15	3.04044e-05
cellular response to inorganic substance	16	3.72705e-05
cellular response to metal ion	15	6.31893e-05
proton transport	15	9.60238e-05
organic hydroxy compound metabolic process	38	0.000120968
terpenoid metabolic process	15	0.000120968
cellular response to chemical stimulus	112	0.000215856
response to metal ion	25	0.000310216
glutathione derivative metabolic process	8	0.000345109
glutathione derivative biosynthetic process	8	0.000345109
primary alcohol metabolic process	7	0.000405398
response to cadmium ion	9	0.000483123
single-organism process	468	0.000500993
cellular hormone metabolic process	14	0.000680223
steroid metabolic process	26	0.000763637
small molecule catabolic process	25	0.000959941
isoprenoid metabolic process	15	0.000997456

## Sheet: Stage IV down-regulated
Enriched biological process terms in down-regulated genes for Stage IV
Term	Count	P-values
oxidation-reduction process	39	1.28296e-11
small molecule metabolic process	92	6.79851e-10
single-organism metabolic process	125	1.86698e-08
cofactor metabolic process	18	9.29825e-05
cellular respiration	14	9.29825e-05
carboxylic acid metabolic process	36	0.000157267
respiratory electron transport chain	11	0.000216113
electron transport chain	11	0.000231347
hydrogen ion transmembrane transport	9	0.000261745
oxoacid metabolic process	37	0.000542656
hydrogen transport	10	0.000565048
cellular hormone metabolic process	10	0.000614588
organic acid metabolic process	37	0.000614588
hormone metabolic process	13	0.000753539
energy derivation by oxidation of organic compounds	18	0.00086365
lipid metabolic process	40	0.000983518
