# Supplementary material for: A system level analysis of gastric cancer across tumor stages with RNA-seq data
Source: Royal Society of Chemistry journal article supplement (doi:10.1039/c5mb00105f), 2015-04-17
Supplement: c5mb00105f3.xlsx [file c5mb00105f3.xlsx]

## Sheet: Stage I up-regulated
Enriched KEGG pathways in up-regulated genes for Stage I
Term	Count	P-value
Cell cycle	30	8.14622e-20
DNA replication	13	1.28862e-11
ECM-receptor interaction	16	2.79845e-09
Homologous recombination	8	1.03688e-06
Focal adhesion	18	2.58242e-05
Mismatch repair	6	4.40418e-05
Protein digestion and absorption	10	0.000135147
Pathways in cancer	22	0.000262068
Amoebiasis	11	0.000301275
Cytokine-cytokine receptor interaction	19	0.000330602
Pyrimidine metabolism	10	0.000703683
p53 signaling pathway	8	0.000886086
Small cell lung cancer	9	0.000924891
Progesterone-mediated oocyte maturation	9	0.00100683
Base excision repair	5	0.00274755
Oocyte meiosis	9	0.00618836
Purine metabolism	11	0.00908707
Nucleotide excision repair	5	0.0096472
TGF-beta signaling pathway	7	0.0125731
One carbon pool by folate	3	0.0155191
Prostate cancer	7	0.0168944
Pancreatic cancer	6	0.017913
Melanoma	6	0.0190954
Ribosome biogenesis in eukaryotes	6	0.0321958
Taurine and hypotaurine metabolism	2	0.0343387
Glioma	5	0.0445337

## Sheet: Stage II up-regulated
Enriched KEGG pathways in up-regulated genes for Stage II
Term	Count	P-value
Cell cycle	27	2.99603e-15
ECM-receptor interaction	22	2.84357e-14
Focal adhesion	25	1.04677e-08
p53 signaling pathway	12	2.27079e-06
Protein digestion and absorption	13	2.60345e-06
Cytokine-cytokine receptor interaction	24	8.42152e-06
Amoebiasis	13	5.23053e-05
Malaria	8	0.000275389
Bladder cancer	7	0.000455488
TGF-beta signaling pathway	10	0.00049534
DNA replication	6	0.00117155
Pathways in cancer	22	0.00142236
Small cell lung cancer	9	0.00218437
Homologous recombination	5	0.00221448
Melanoma	8	0.0025786
Phagosome	12	0.00551443
Glioma	7	0.00609549
Progesterone-mediated oocyte maturation	8	0.00835368
Pancreatic cancer	7	0.00910856
Rheumatoid arthritis	8	0.0115949
Oocyte meiosis	9	0.0133262
Chronic myeloid leukemia	6	0.0365484
Mismatch repair	3	0.041266

## Sheet: Stage III up-regulated
Enriched KEGG pathways in up-regulated genes for Stage III
Term	Count	P-value
ECM-receptor interaction	24	2.21565e-16
Cell cycle	26	3.02559e-14
Focal adhesion	27	4.95538e-10
p53 signaling pathway	12	2.39402e-06
Amoebiasis	15	2.40962e-06
Protein digestion and absorption	13	2.75388e-06
Pathways in cancer	27	1.29494e-05
Small cell lung cancer	10	0.000567073
Cytokine-cytokine receptor interaction	20	0.000632748
Malaria	7	0.00155494
Homologous recombination	5	0.00226378
Bladder cancer	6	0.00273313
Phagosome	12	0.00573688
Glioma	7	0.00626208
DNA replication	5	0.00696652
TGF-beta signaling pathway	8	0.00748492
Progesterone-mediated oocyte maturation	8	0.00859958
Melanoma	7	0.0100825
Oocyte meiosis	9	0.0137362
Pancreatic cancer	6	0.0312283
Prostate cancer	7	0.0313898
Rheumatoid arthritis	7	0.0348567
Basal cell carcinoma	5	0.0383339
Staphylococcus aureus infection	5	0.0383339
Hedgehog signaling pathway	5	0.0409729
Mismatch repair	3	0.0417884
Taurine and hypotaurine metabolism	2	0.0434134

## Sheet: Stage IV u-regulated
Enriched KEGG pathways in up-regulated genes for Stage IV
Term	Count	P-value
ECM-receptor interaction	17	6.23832e-12
Focal adhesion	19	1.60241e-07
Protein digestion and absorption	12	3.11935e-07
Amoebiasis	13	9.33795e-07
Cell cycle	14	9.72014e-07
TGF-beta signaling pathway	8	0.000737269
Cytokine-cytokine receptor interaction	15	0.00130078
Phagosome	10	0.00306025
Small cell lung cancer	7	0.00365462
Rheumatoid arthritis	7	0.00533491
Malaria	5	0.00658745
DNA replication	4	0.00961356
Bladder cancer	4	0.0163977
Dorso-ventral axis formation	3	0.0179309
Pathways in cancer	14	0.0203914
Osteoclast differentiation	7	0.03056
Non-homologous end-joining	2	0.0361242
Staphylococcus aureus infection	4	0.0396131
Oocyte meiosis	6	0.0476765
