# Supplementary material for: A system level analysis of gastric cancer across tumor stages with RNA-seq data
Source: Royal Society of Chemistry journal article supplement (doi:10.1039/c5mb00105f), 2015-04-17
Supplement: c5mb00105f4.xlsx [file c5mb00105f4.xlsx]

## Sheet: Stage I down-regulated
Enriched KEGG pathways in down-regulated genes for Stage I
Term	Count	P-value
Parkinson's disease	20	4.52305e-07
Oxidative phosphorylation	19	2.50253e-06
Vascular smooth muscle contraction	17	6.70906e-06
Calcium signaling pathway	19	0.000167686
Alzheimer's disease	18	0.000236755
Huntington's disease	19	0.000259628
Cardiac muscle contraction	11	0.00036941
Metabolism of xenobiotics by cytochrome P450	9	0.0029436
Arachidonic acid metabolism	8	0.00325973
Pancreatic secretion	11	0.00356865
Gastric acid secretion	9	0.0039104
Cell adhesion molecules (CAMs)	13	0.00413722
Malaria	7	0.00543884
Carbohydrate digestion and absorption	6	0.0101843
Salivary secretion	9	0.0129547
Intestinal immune network for IgA production	6	0.0153773
Protein digestion and absorption	8	0.021247
Glycosphingolipid biosynthesis - ganglio series	3	0.0237498
Aldosterone-regulated sodium reabsorption	5	0.0316566
B cell receptor signaling pathway	7	0.0395599

## Sheet: Stage II down-regulated
Enriched KEGG pathways in down-regulated genes for Stage II
Term	Count	P-value
Metabolism of xenobiotics by cytochrome P450	15	6.46596e-08
Drug metabolism - cytochrome P450	13	3.89654e-06
Metabolic pathways	70	2.23521e-05
Fatty acid metabolism	8	0.000217298
Arachidonic acid metabolism	9	0.000422223
Gastric acid secretion	10	0.00055551
Arginine and proline metabolism	8	0.00107541
Valine, leucine and isoleucine degradation	7	0.00143575
Nitrogen metabolism	5	0.00166722
Intestinal immune network for IgA production	7	0.00241534
Glutathione metabolism	7	0.00306632
Retinol metabolism	8	0.00326886
Glycolysis / Gluconeogenesis	8	0.00360474
Pyruvate metabolism	6	0.00425331
Oxidative phosphorylation	12	0.00534331
Linoleic acid metabolism	5	0.00564822
Propanoate metabolism	5	0.00749054
Pentose and glucuronate interconversions	5	0.00749054
Primary immunodeficiency	5	0.010981
Proximal tubule bicarbonate reclamation	4	0.0113033
Fructose and mannose metabolism	5	0.0123555
Parkinson's disease	11	0.0126088
Malaria	6	0.0139701
PPAR signaling pathway	7	0.019043
Histidine metabolism	4	0.0252589
Butanoate metabolism	4	0.028276
Biosynthesis of unsaturated fatty acids	3	0.0469133

## Sheet: Stage III down-regulated
Enriched KEGG pathways in down-regulated genes for Stage III
Term	Count	P-value
Metabolic pathways	98	2.7639e-11
Metabolism of xenobiotics by cytochrome P450	20	2.98362e-11
Drug metabolism - cytochrome P450	20	5.22975e-11
Oxidative phosphorylation	23	2.7869e-08
Parkinson's disease	21	4.35541e-07
Retinol metabolism	13	5.56817e-06
Alzheimer's disease	22	7.82123e-06
Arachidonic acid metabolism	12	1.26743e-05
Huntington's disease	22	3.39665e-05
Glutathione metabolism	10	7.89754e-05
Linoleic acid metabolism	7	0.000352476
Fatty acid metabolism	8	0.0006915
Arginine and proline metabolism	9	0.000750367
Cardiac muscle contraction	11	0.000777736
Histidine metabolism	6	0.00183923
Gastric acid secretion	10	0.00206121
Glycolysis / Gluconeogenesis	9	0.00288483
Pentose and glucuronate interconversions	6	0.00312084
Nitrogen metabolism	5	0.00353656
Pentose phosphate pathway	5	0.00728867
Peroxisome	9	0.0105533
Tyrosine metabolism	6	0.0109183
Valine, leucine and isoleucine degradation	6	0.0152669
Bile secretion	8	0.0165341
Primary immunodeficiency	5	0.021678
Intestinal immune network for IgA production	6	0.0227562
Fructose and mannose metabolism	5	0.0242485
Glycerolipid metabolism	6	0.0272931
Ascorbate and aldarate metabolism	4	0.0305053
Tryptophan metabolism	5	0.0437461
Aldosterone-regulated sodium reabsorption	5	0.0437461
Steroid hormone biosynthesis	6	0.0443546
Butanoate metabolism	4	0.0484322

## Sheet: Stage IV down-regulated
Enriched KEGG pathways in down-regulated genes for Stage IV
Term	Count	P-value
Metabolic pathways	53	1.61193e-09
Fatty acid metabolism	8	2.62204e-06
Valine, leucine and isoleucine degradation	7	3.34107e-05
Parkinson's disease	11	8.92934e-05
Oxidative phosphorylation	11	0.000102579
Metabolism of xenobiotics by cytochrome P450	8	0.000116807
Drug metabolism - cytochrome P450	8	0.000142423
Peroxisome	8	0.000248452
Retinol metabolism	7	0.000380649
Huntington's disease	12	0.000477174
Alzheimer's disease	11	0.000795951
Arginine and proline metabolism	6	0.000925204
Amino sugar and nucleotide sugar metabolism	5	0.00332611
Propanoate metabolism	4	0.00444196
Biosynthesis of unsaturated fatty acids	3	0.00947355
Pyruvate metabolism	4	0.00990723
Tyrosine metabolism	4	0.0108011
Glycolysis / Gluconeogenesis	5	0.0120505
Gastric acid secretion	5	0.020216
Histidine metabolism	3	0.0230123
Cardiac muscle contraction	5	0.0235852
Butanoate metabolism	3	0.0251806
Glycine, serine and threonine metabolism	3	0.0298359
Pentose and glucuronate interconversions	3	0.0298359
Steroid hormone biosynthesis	4	0.0307329
TGF-beta signaling pathway	5	0.0328017
Phenylalanine metabolism	2	0.0496675
