# Supplementary material for: A system level analysis of gastric cancer across tumor stages with RNA-seq data
Source: Royal Society of Chemistry journal article supplement (doi:10.1039/c5mb00105f), 2015-04-17
Supplement: c5mb00105f5.xlsx [file c5mb00105f5.xlsx]

## Sheet: Cluster 3
Genes in Cluster 3	Genes in Cluster 4	Genes in Cluster 9
USP47	LINC00094	CCDC102A
POLK	ZMYND11	FIBIN
NSMAF	TSTD2	GPC6
FBXO11	ANKRD40	SERPING1
ZNF148	STRN3	GAS7
ZNF451	ABI2	DLG4
PUM2	AK130294	TXNIP
DNAJC13	IDS	CYP1B1
AK055981	OSBPL1A	C7
AK074396	MTR	FAM20C
MYL6	PPP3CB	PER1
EPC2	DCBLD2	PRKAR2B
MATR3	PHF10	ADAMTS1
KIAA1109	CLASP2	AX747246
ZNF638	PKNOX1	SIX2
DQ591995	CAMK2G	COLEC12
TSC1	DYNC1LI2	SCAF8
ANAPC4	FTO	COPE
FEM1C	STX2	2015-09-06
PBRM1	CHN1	LOC283070
WDR48	METTL16	DDX1
ZRANB2	DNM1L	OLFML1
UBR1	HOXB4	ZEB2
MDM4	LAMC1	PAPLN
MYADM	RNF216	RCC1
TUG1	INPP5F	IL3RA
U2SURP	LOC100506548	IGFBP7
RANBP2	PCM1	TSPAN11
CCNT1	PTPN11	TSPAN9
CREB1	ZNF532	XPO1
2-mar	ZDHHC17	KLF10
AP3M1	PIP4K2B	LTBP4
SLC25A4	CYB5D1	LATS1
ZFYVE16	AXL	COL8A2
PTAR1	AB488780	FBLN5
CGGBP1	COL4A1	HEYL
CKB	CORO1C	RAD21
PHF3	NID2	IKBKAP
FAN1	VEZF1	PKMYT1
AL831889	SNX1	WDR34
REST	SESTD1	SH3BP5
FAM160B1	NEK9	AHNAK2
PIK3C2A	CLUAP1	GNG2
SPOPL	SATB1	LOC255130
ZNF33A	BMPR1A	TPP2
NKTR	BC022047	TUBB6
ZNF644	PNMA1	EIF5A
AFF1	CSDE1	ENDOG
SDAD1	DYSF	ARHGAP31
NCKAP1	RABGAP1	APRT
RIF1	ATL2	FAM83D
KIAA1429	MGEA5	CDT1
ZNF12	SPIN1	LAMA2
DMTF1	SERINC1	MRPS34
TIA1	NUCKS1	PDGFRB
SORBS2	FAM168B	LPAR1
DENND4A	LCAT	KLF7
FASTKD2	PSIP1	MAGEH1
FXYD1	CR936688	BPTF
NR2C2	SEMA3A	KCTD20
PTGIS	PTPN14	THY1
DDX17	COL4A2	ZNF146
ZZZ3	KIAA1143	RSPO3
MAPK14	VPS45	VEGFC
ADNP	DDHD2	FARSA
XPO4	KLHDC5	FGL2
OTUD4	CASC3	EMP3
LOC100507577	C11orf95	APOLD1
TBCK	BBX	GPNMB
PLDN	MOAP1	JMJD8
CHM	NRBP2	CLIP1
ZBED5	SGCB	ADH1B
SETD2	PPP2R5C	RBM26
CEBPZ	SETD3	CDCA5
SCARNA7	MOB1B	ROBO1
ZNF292	ARVCF	SHISA3
DCAF17	SENP6	AX747968
ZNF192	PHF21A	PMP22
PDLIM4	TWSG1	VIM
PCSK7	SGCE	CENPM
MAOB	CAV1	MEF2C
SLC39A13	LPPR2	KIRREL
PMS1	ARIH2	TMEM204
RAPGEF6	OBSL1	ELN
ZMYM5	IGIP	ADAM19
SEPW1	C1orf216	TMEM238
DIAPH2	CAB39L	MRPS12
GABARAPL1	KDELC2	CDCA8
NPHP3	DCAF8	CLN6
BTBD7	NHLRC2	GEM
TRAPPC6B	7-SEP	TRABD
NEMF	SLC38A1	AEBP1
PRPF4B	APBB2	SPC25
TMEM106B	HOXB3	CD34
PIK3R4	BRD3	RAB3IL1
MOCS1	DQ593252	A2M
SLC25A36	LZTS2	CITED2
ZMYM2	IPO5	GRASP
ZNF766	TAF9B	AHNAK
PAPOLG	H2AFV	PSMB10
R3HDM1	ZRANB1	HSPA12B
SH3GLB1	AKAP11	MLST8
BCLAF1	JMY	SOCS4
HOMER3	ZMAT3	THBS4
PALM	FXR1	PSMG3
KRR1	DPYSL2	LTV1
PREPL	DPF2	RPUSD1
SON	NEDD4	RGS2
MTMR6	FAM8A1	STX10
PRPF39	FHL3	C1R
MKLN1	ZNF160	CPE
LSM4	RAB12	NAA25
SREK1	CCDC92	TRAPPC5
SMG1	B3GALNT2	COL8A1
LNPEP	RG9MTD3	TIMM13
ZNF227	SCRN1	FBLN1
PNN	LRCH1	NCAPH2
SETX	TRIM37	GREM1
CWC22	RPS6KA5	CILP
ATM	FOXF2	GNG11
RNPC3	MECP2	MYCT1
SIKE1	SIRT1	PCOLCE
BTG2	CDK5RAP2	NCLN
RNMT	ZNF34	MOB3A
ZNF143	C1orf198	FBN1
VWA1	KLHL20	KCNE4
C19orf24	HP1BP3	ICAM3
USP33	USP12	SFRP2
EIF4G2	COL16A1	C1S
CTXN1	RRAGB	GAPVD1
NXF1	SYNGAP1	USP1
KIAA0368	STARD13	DDX18
SNAPC2	AFAP1	AK126266
NRAS	EFR3A	SIRT6
GGNBP2	BNIP2	LRRC32
SLIT3	KIDINS220	SOX18
FNBP4	RNF38	ATAD3A
MRPL19	PARD3B	ATP6V0C
LDOC1	SEMA4C	TARDBP
RLF	COL15A1	EHD3
SLC2A4RG	IPO7	CRISPLD2
VPS13C	COL6A1	DHX9
YTHDF3	MTSS1L	FRMD6
BRD8	CTF1	EDNRA
MAPK1	TCEAL3	DCN
OSBPL11	LDLRAD2	MCAT
APPL1	LAMA5	NFATC1
MGA	KLF11	FBXW9
GPATCH8	FLJ00285	POP7
RPS2	L1CAM	NOB1
LRPPRC	FKBP7	TOMM40
MLL3	TCFL5	PPIA
PHF20L1	DTX3	FBLN2
NF1	PLCB1	PLK1
NAA35	PCMTD1	MAP2K2
DPP8	ENO2	RASL12
SLTM	CSRNP2	WDR18
DL490427	PFKM	LTBP2
CHD9	FOXP1	EXOSC4
EPN2	RCOR3	MRC2
BC073897	SENP5	TSPAN4
RAPGEF2	DCUN1D4	TBC1D24
AHSA2	SETD7	TRIP12
HS2ST1	AF055024	ZNF593
RSRC2	HOXA3	MDFIC
SSNA1	SYNC	NDUFB7
RNF219	WAC	CTSO
PIKFYVE	SMARCA5	GPR68
FAM98C	KIAA1430	TMEM88
PAN3	CLCN6	CHAF1A
RAB10	NKIRAS1	IGFBP6
SNX13	PTGFRN	S1PR1
DNTTIP2	ASB1	SH3GL1
TCERG1	UTS2	PLEKHO2
GOLGB1	RUFY2	RPS15
AFF4	NEK7	SYNPO
THOC1	ANKS1A	CXCR3
AK094621	ZNF280D	FAM195A
APC	AS3MT	MMRN2
RPAP3	BBS7	COX6A1
RC3H1	CRTC3	LOC144571
TTC37	SPIRE1	BGN
BRAP	PHIP	CYYR1
ANKRD65	GPC4	SNX29
FAM195B	HLTF	PPM1M
CTDSPL2	TOP2B	NOC4L
NOL8	TLK1	ARMC6
C1GALT1	TYW3	KIAA0922
PGLS	C22orf39	RRP9
CHRDL2	PRKAR1A	NDUFA11
ZNF770	AK000953	FUT5
MAL	IGF2	TBC1D10B
PTGS1	DNAJC24	MRPL4
HNRPLL	RDX	TMEM126B
SBNO1	HNRNPU-AS1	AURKAIP1
ARID2	UBXN10	TMEM48
HNRNPH1	CUL1	MFAP5
ACTR6	CSNK2A2	TMUB1
HDGFRP2	KLHL23	RARRES2
AK023288	ARHGEF10	PLXDC2
SOS1	AIDA	EFEMP1
CAPZA1	HSF2	CLPP
DDX39A	GNPDA2	SELPLG
AMMECR1L	ARPP19	MAD2L1
RNF141	CAPN7	GADD45GIP1
MON2	CLASP1	ABI3
SLU7	HEATR8	CD247
ROCK2	ZNF438	BIN2
SPTBN1	TROVE2	DARC
EVI5	ZNF337	PTPN7
JMJD1C	AARSD1	STUB1
TMOD3	LSM14A	SASH3
HOPX	CELF1	C19orf70
UBA3	TSPYL1	ADAMTSL4
ARHGDIA	C1orf192	HCLS1
MAP4K5	ZNF639	LPXN
TIAL1	RPRD1A	RAC2
MAP3K2	DCUN1D2	ITGA4
ASNSD1	HTRA1	GPSM3
STRN	SEMA3C	MAP4K1
CLK1	KIAA0430	LAIR1
TBL1XR1	TCP11L1	WAS
ARHGEF12	TMX3	2015-09-01
ZC3H11A	C5orf24	CD3E
CTGF	GNAZ	CCDC94
GCFC1	RAB2B	ARHGEF6
EPS15	DHX57	S1PR4
TBC1D15	LRCH3	ARHGAP25
CCDC93	RYK	LAT2
AK293147	NR_026754	MAFB
C12orf4	EBF4	VAV1
UBE3B	FRS2	SRSF1
PPWD1	C19orf68	DOK2
ITCH	ZNF354A	IGFLR1
STAU2	GEMIN5	GNB2
STXBP3	FEZ2	TNFAIP8L2
ZBTB11	ZNF362	LSP1
EEA1	TNRC6A	CD2
METAP1	SDC2	CYTIP
CHD1	ZNF580	CD53
RBM5	MMGT1	CD27
BTAF1	CTSL1	ITGB2
SCAF11	EIF4ENIF1	LCP1
ATG2B	UBR3	TCRBV3S1
WDR75	DCP1B	CYTH4
ARL8B	LOC286437	PIP4K2A
SF3B1	TAF1	PLCG2
KDM3A	PHC3	FAM78A
TMEM93	CBX1	ACAP1
NAE1	THAP8	PES1
DIS3	TTF1	EVI2B
RIOK2	SIK3	CD3G
ABI1	TSPYL5	ITGAL
CYR61	SRR	CD4
PNPT1	FAM116A	MYO1F
DDX3X	ABCA3	NCKAP1L
FAM108A1	AK055323	CSF2RB
MRPL32	DTWD1	ARHGAP9
PI16	TES	TBC1D10C
CPNE3	RBM43	ARHGDIB
MORC3	IMPAD1	SPI1
EIF5	RBBP7	IKZF1
ZMYM6	THUMPD1	RASAL3
ZNF224	AK098095	LAPTM5
MIOS	PPP1R21	FGD3
SEC24B	CRYZL1	PTPRC
PUM1	NPTN	P2RY8
ZCCHC6	GCFC2	DOCK2
EXOC1	ZC3H7A	PPM1G
USP15	COX20	ARHGAP30
C14orf80	TEF	ECI1
YJEFN3	ITGB1	AKNA
GPD2	SBF2	TCRBV2S1
ARHGAP5	REV3L	AOAH
ZFC3H1	INTS3	C1QC
MFSD8	ZNF271	KLF16
RFXANK	DST	CORO1A
KIAA2018	MAPRE1	EBI3
WDR26	AK054970	HMHA1
SOS2	MIR3911	DOK3
FBXO28	PFN2	SIT1
DD182001	CDS2	PTPRCAP
UBE2W	TCEA2	BC078172
FCHO2	SMARCA2	PARVG
DICER1	FAM65A	RHOH
RSC1A1	SKI	SLA
OSBPL8	ZFHX3	CPNE5
FAM49B	RSU1	CD6
DM376720	EPM2AIP1	C1QTNF5
ZFP62	PHF2	CD48
IVNS1ABP	PID1	FMNL1
TGS1	C6orf72	DOCK8
CNST	LRRC58	NCF4
FAM46B	GABPB2	HCST
TRAPPC11	CBLL1	SIRPG
EP300	PER3	CD3D
OXSR1	KLHL7	FLI1
RPS9	PCDH7	RNASE6
MRPL41	LRRC47	SLCO2B1
IPO11	CSGALNACT2	TMC8
LIMA1	RAP1A	ATP5D
LSMD1	LAMB2	BASP1
NAA50	SLC12A4	C16orf13
SHOC2	ATG14	CYBRD1
CNOT1	C1orf21	SIGLEC10
COX15	WSB1	KLRB1
SMNDC1	TNRC6C	GAL3ST4
HECTD1	TPR	CECR1
ELOF1	TFDP2	BCL7C
ETAA1	DDX24	PDS5A
MED17	KAT7	CD79A
GTF3C3	KLC1	HIGD2A
ORC4	TMX4	JAK3
SP3	OSBPL5	STK10
ACAP2	STXBP1	IL10RA
TATDN1	TSPYL4	LOC100129083
CAB39	H19	RBP5
SP1	SNX27	TMEM119
ATMIN	KCTD15	C3
RBM12	FAM54B	PREX1
RNF126	FMR1	ECSCR
CLPX	TTC33	AK097472
SPTLC1	ASAP1	FAIM3
GNL3	PELI3	NUDC
TNKS2	GLIS2	LIMD2
GPBP1	CTDSPL	GZMK
AIMP1	FOXJ2	GMFG
ZNF628	VAMP4	TBL3
ZSCAN29	INPP5B	C1orf38
FBXO38	RBPJ	MRPL28
DL490795	LARP6	PLD4
NIPA2	TRIO	CLEC14A
C9orf142	COL6A3	C19orf43
TRMT11	ATPAF1	CD37
7-mar	APPBP2	PVRIG
TSSC4	TCEAL4	LY86
FAM71E1	ATXN3	NDUFS7
CAND1	ZNF704	MOXD1
ZNF90	ZNF330	CYGB
FBXO3	REV1	FAM113B
DPY19L4	UBE2Q2	LYL1
NUP54	LBR	SPOCK2
LOC407835	RBMS2	CD14
PLEKHA1	AX765719	MPEG1
ICAM2	PLEKHA5	NAPSB
KIAA1033	BTC	LTB
UBR2	TMEM8B	CD79B
TAX1BP1	ZNF219	TIE1
PTK2	AK021563	TCRBV14.1-J2.1
PGM3	KDSR	AK097351
AP1G1	TULP3	SELP
ANKRD36BP1	LATS2	CCR7
MPHOSPH10	ZNF397	HSPBP1
PTN	WIZ	HVCN1
FAM76B	N4BP2L2	NUP35
TNPO1	ZFP106	PPP1R16B
GSK3B	ARIH1	C11orf96
WWP1	PHAX	MRPL30
FAM83B	PTMS	TEK
ZFAND1	SIX5	CLIC2
ALYREF	NOD1	SELL
TOM1L1	CBR4	TAGAP
SRPK1	ISLR	BC127952
RCHY1	EHBP1	CR2
RNH1	ZNF37A	VPREB3
ZDHHC21	NCALD	MS4A1
MTMR10	EXOC5	NUBP2
CD2AP	KCTD7	HIC1
TRAF6	EIF4G3	ANKRD39
C12orf29	TAB2	CCL19
PPHLN1	RABEP1	MPV17L2
YAE1D1	LUC7L2	MSC
TMEM87B	CASD1	LRRC25
SLC39A3	BC127854	MZT2B
C17orf72	ZNF302	ARHGAP15
NOC3L	WNK2	AK126693
CSRP2	SMARCA1	TRAF1
SCAND1	ZYX	ETS1
ACBD5	ARMC8	GIMAP7
AASDHPPT	RHOBTB3	CD52
ZBTB6	MTERFD3	TEFM
HERC4	LOC100499466	TGFB1
ZNF688	KAT6B	GIMAP1-GIMAP5
USO1	ADH5	CXCL13
CLOCK	DLGAP4	SH2D3C
PAPOLA	PLEKHG2	TIMM44
EGR1	PRKRA	MZT2A
TRPM7	LYSMD4	ARID5A
MICALL1	FAM20B	PTGDS
ZBTB1	WASF1	GIMAP4
DOPEY1	ATN1	SIPA1
LUST	DDX50	PPP1R18
BAG5	ATRX	ADAP2
ZNF207	CWC27	CD69
USP24	TTC8	RAMP2
CCDC76	TTYH2	CKAP2
PKN2	PHF20	PSMD14
INTS6	EHBP1L1	GIMAP6
GADD45B	UBE2G2	NUP37
RPAP2	PPP1CA	FMNL3
C15orf29	NUDT6	MS4A6A
CCAR1	HNRNPH3	PIK3CD
IREB2	PEX5	VCAM1
KIAA0528	NOL9	SERPINF1
UMPS	ACTB	CSTF3
ASXL2	LMAN2	POU2F2
C12orf35	ANO6	CYFIP2
KIF21A	MEIS2	CSF1R
EPT1	DKK3	WIPF1
RAB14	PDGFC	LTC4S
SMARCC1	FLYWCH1	RNF166
CCNT2	POGZ	RCSD1
BACH1	NAV2	ACVRL1
RFX7	SRSF4	RAMP3
LMBRD1	SLC25A39	MAZ
BTBD10	ZFP1	GGT5
CDK13	MRFAP1	FDCSP
PCP4	AHCTF1	WDR12
TMEM167A	ROCK1	NUFIP2
UBXN1	RPS6KC1	FOLR2
PRDM4	DOCK11	C1orf162
USP8	TTL	EVL
TGDS	KIAA1274	GPR183
MAT2B	CDC73	CTU1
PDCD6IP	GAS1	ENG
RNF111	MBNL2	C16orf42
SMARCAD1	PRKACA	PPAN-P2RY11
BIRC2	ZFR	UBXN6
UBA6	TUBG2	CCL21
KIAA1715	GBP2	GJA4
RBM33	LOC100129361	CLSTN3
PLAC9	ZNF512	NUDCD1
CFD	PCGF6	CALHM2
CCNL1	MMD	CCT6A
WDR36	USP11	VASH1
IKZF5	RAB3GAP1	LRRC33
YTHDC2	FAM92A1	RASSF2
TPGS1	DCAF10	MYO9B
MIR762	PELO	RFTN1
RARS	TOX	STAB1
ESCO1	C7orf41	GIMAP8
TBK1	CDK17	SNRPA
TFB2M	ARSB	CDC37
PALB2	YPEL5	SF3A2
FUZ	STK3	CFH
ZNF800	MYH10	NOL11
ANKRD17	ZNF558	F13A1
SCYL2	SLC25A23	SMC2
MRPL42	IFT74	ZNF414
TMEM161B	DCAF6	IL1R1
CLEC3B	PPM1A
CNEP1R1	BACE1
BIRC6	SMAD2
ETNK1	NREP
SMC5	BCL9
SPIB	RNF146
HAT1	ZNF251
LENG1	2-sep
RBM22	NADKD1
KIAA0196	ZSCAN21
HNRNPR	BC065231
PSME4	HOXB2
GPR155	SLC25A26
RBM7	TMEM194A
PTCD3	SMU1
EIF2A	ARNT
ORMDL1	SMAD4
AQR	CALM1
RING1	FN1
C4orf29	NID1
NPAT	LZTFL1
PARP4	GFPT2
KBTBD2	MICAL3
DGCR6L	VEGFB
PIN1	DIS3L
RMI1	AK128361
SACM1L	RRAGA
IL17RC	RERE
ARL6IP4	UVRAG
RBM42	SMAD5
VPS54	CALU
FAM176B	KIAA0947
MYPOP	HOOK3
SEPSECS	MSANTD4
CTBP1	CUEDC1
VPS36	C16orf48
RSPRY1	CHD6
TANK	BDP1
LYSMD3	TBC1D17
LEO1	ATF7
GCC2	HNRNPA3
TRIQK	KLHL26
OGT	BC040208
MMADHC	NIN
CEPT1	DM074112
FNDC3A	AK057887
BC104003	COPS2
ZNHIT2	MIB1
RBM45	C6orf228
CBX3	SPAG9
DDX21	KCTD2
NUP160	HIRIP3
PRR14L	ATXN2
UBE2MP1	TWISTNB
SSBP4	NAA30
CCL14	CRIM1
ZW10	CD81
FASTKD1	RBMS1
NSUN3	SKAP2
SNX6	ZNF358
DUSP1	C1orf172
UEVLD	PACS2
STX12	FBXW2
SPTY2D1	NCBP2
TMEM68	BMPR2
MPP5	BCAP29
TRUB1	SHISA4
WDR43	FAM217B
FTSJD1	MLLT1
UBE4A	OLFML2A
TAF1D	ATAD1
KLF3	ZDHHC12
PRKAA1	EIF2C4
PAN2	ZC3H14
KIF2A	PURB
SRSF7	HIAT1
FGD4	TRMT5
SPG11	ANKRD10
JUN	HSDL1
SLC35A5	BRWD1
XRN1	ZNF181
VPS13A	KPNA1
IMPA1	TCEAL1
AGGF1	ARHGEF9
2015-03-06	PTPRS
AK128593	PDK3
DOHH	FAM198B
PIK3CB	PCNP
ARHGAP12	CUL5
POLR1B	RTN4
MAT2A	SCARF2
SMC6	CAMK1
ARFGEF1	BC019904
CTCF	PRR24
WDR11	LRIG1
HEATR5B	KLHDC8B
PRPF40A	ZNF187
LOC100506540	CASP8AP2
ZFP36	RFC1
ARCN1	ERC1
MAGI3	FEM1B
GPBP1L1	PTPN21
COPB1
SCFD1
GTF2A1
FAM207A
CPSF3
SPAST
BIVM-ERCC5
IARS
TBC1D23
CCDC124
PPIP5K2
USP3
UBXN4
LOC100130197
C1orf27
FKBP8
FOXN2
MTIF2
TOPBP1
EPRS
SRBD1
ERI2
FAM111A
IBTK
DHX15
SLC30A6
ZCCHC8
C10orf28
FOSB

## Sheet: Sheet2
	Cluster4
1	LINC00094
2	ZMYND11
3	TSTD2
4	ANKRD40
5	STRN3
6	ABI2
7	AK130294
8	IDS
9	OSBPL1A
10	MTR
11	PPP3CB
12	DCBLD2
13	PHF10
14	CLASP2
15	PKNOX1
16	CAMK2G
17	DYNC1LI2
18	FTO
19	STX2
20	CHN1
21	METTL16
22	DNM1L
23	HOXB4
24	LAMC1
25	RNF216
26	INPP5F
27	LOC100506548
28	PCM1
29	PTPN11
30	ZNF532
31	ZDHHC17
32	PIP4K2B
33	CYB5D1
34	AXL
35	AB488780
36	COL4A1
37	CORO1C
38	NID2
39	VEZF1
40	SNX1
41	SESTD1
42	NEK9
43	CLUAP1
44	SATB1
45	BMPR1A
46	BC022047
47	PNMA1
48	CSDE1
49	DYSF
50	RABGAP1
51	ATL2
52	MGEA5
53	SPIN1
54	SERINC1
55	NUCKS1
56	FAM168B
57	LCAT
58	PSIP1
59	CR936688
60	SEMA3A
61	PTPN14
62	COL4A2
63	KIAA1143
64	VPS45
65	DDHD2
66	KLHDC5
67	CASC3
68	C11orf95
69	BBX
70	MOAP1
71	NRBP2
72	SGCB
73	PPP2R5C
74	SETD3
75	MOB1B
76	ARVCF
77	SENP6
78	PHF21A
79	TWSG1
80	SGCE
81	CAV1
82	LPPR2
83	ARIH2
84	OBSL1
85	IGIP
86	C1orf216
87	CAB39L
88	KDELC2
89	DCAF8
90	NHLRC2
91	2015-09-07
92	SLC38A1
93	APBB2
94	HOXB3
95	BRD3
96	DQ593252
97	LZTS2
98	IPO5
99	TAF9B
100	H2AFV
101	ZRANB1
102	AKAP11
103	JMY
104	ZMAT3
105	FXR1
106	DPYSL2
107	DPF2
108	NEDD4
109	FAM8A1
110	FHL3
111	ZNF160
112	RAB12
113	CCDC92
114	B3GALNT2
115	RG9MTD3
116	SCRN1
117	LRCH1
118	TRIM37
119	RPS6KA5
120	FOXF2
121	MECP2
122	SIRT1
123	CDK5RAP2
124	ZNF34
125	C1orf198
126	KLHL20
127	HP1BP3
128	USP12
129	COL16A1
130	RRAGB
131	SYNGAP1
132	STARD13
133	AFAP1
134	EFR3A
135	BNIP2
136	KIDINS220
137	RNF38
138	PARD3B
139	SEMA4C
140	COL15A1
141	IPO7
142	COL6A1
143	MTSS1L
144	CTF1
145	TCEAL3
146	LDLRAD2
147	LAMA5
148	KLF11
149	FLJ00285
150	L1CAM
151	FKBP7
152	TCFL5
153	DTX3
154	PLCB1
155	PCMTD1
156	ENO2
157	CSRNP2
158	PFKM
159	FOXP1
160	RCOR3
161	SENP5
162	DCUN1D4
163	SETD7
164	AF055024
165	HOXA3
166	SYNC
167	WAC
168	SMARCA5
169	KIAA1430
170	CLCN6
171	NKIRAS1
172	PTGFRN
173	ASB1
174	UTS2
175	RUFY2
176	NEK7
177	ANKS1A
178	ZNF280D
179	AS3MT
180	BBS7
181	CRTC3
182	SPIRE1
183	PHIP
184	GPC4
185	HLTF
186	TOP2B
187	TLK1
188	TYW3
189	C22orf39
190	PRKAR1A
191	AK000953
192	IGF2
193	DNAJC24
194	RDX
195	HNRNPU-AS1
196	UBXN10
197	CUL1
198	CSNK2A2
199	KLHL23
200	ARHGEF10
201	AIDA
202	HSF2
203	GNPDA2
204	ARPP19
205	CAPN7
206	CLASP1
207	HEATR8
208	ZNF438
209	TROVE2
210	ZNF337
211	AARSD1
212	LSM14A
213	CELF1
214	TSPYL1
215	C1orf192
216	ZNF639
217	RPRD1A
218	DCUN1D2
219	HTRA1
220	SEMA3C
221	KIAA0430
222	TCP11L1
223	TMX3
224	C5orf24
225	GNAZ
226	RAB2B
227	DHX57
228	LRCH3
229	RYK
230	NR_026754
231	EBF4
232	FRS2
233	C19orf68
234	ZNF354A
235	GEMIN5
236	FEZ2
237	ZNF362
238	TNRC6A
239	SDC2
240	ZNF580
241	MMGT1
242	CTSL1
243	EIF4ENIF1
244	UBR3
245	DCP1B
246	LOC286437
247	TAF1
248	PHC3
249	CBX1
250	THAP8
251	TTF1
252	SIK3
253	TSPYL5
254	SRR
255	FAM116A
256	ABCA3
257	AK055323
258	DTWD1
259	TES
260	RBM43
261	IMPAD1
262	RBBP7
263	THUMPD1
264	AK098095
265	PPP1R21
266	CRYZL1
267	NPTN
268	GCFC2
269	ZC3H7A
270	COX20
271	TEF
272	ITGB1
273	SBF2
274	REV3L
275	INTS3
276	ZNF271
277	DST
278	MAPRE1
279	AK054970
280	MIR3911
281	PFN2
282	CDS2
283	TCEA2
284	SMARCA2
285	FAM65A
286	SKI
287	ZFHX3
288	RSU1
289	EPM2AIP1
290	PHF2
291	PID1
292	C6orf72
293	LRRC58
294	GABPB2
295	CBLL1
296	PER3
297	KLHL7
298	PCDH7
299	LRRC47
300	CSGALNACT2
301	RAP1A
302	LAMB2
303	SLC12A4
304	ATG14
305	C1orf21
306	WSB1
307	TNRC6C
308	TPR
309	TFDP2
310	DDX24
311	KAT7
312	KLC1
313	TMX4
314	OSBPL5
315	STXBP1
316	TSPYL4
317	H19
318	SNX27
319	KCTD15
320	FAM54B
321	FMR1
322	TTC33
323	ASAP1
324	PELI3
325	GLIS2
326	CTDSPL
327	FOXJ2
328	VAMP4
329	INPP5B
330	RBPJ
331	LARP6
332	TRIO
333	COL6A3
334	ATPAF1
335	APPBP2
336	TCEAL4
337	ATXN3
338	ZNF704
339	ZNF330
340	REV1
341	UBE2Q2
342	LBR
343	RBMS2
344	AX765719
345	PLEKHA5
346	BTC
347	TMEM8B
348	ZNF219
349	AK021563
350	KDSR
351	TULP3
352	LATS2
353	ZNF397
354	WIZ
355	N4BP2L2
356	ZFP106
357	ARIH1
358	PHAX
359	PTMS
360	SIX5
361	NOD1
362	CBR4
363	ISLR
364	EHBP1
365	ZNF37A
366	NCALD
367	EXOC5
368	KCTD7
369	EIF4G3
370	TAB2
371	RABEP1
372	LUC7L2
373	CASD1
374	BC127854
375	ZNF302
376	WNK2
377	SMARCA1
378	ZYX
379	ARMC8
380	RHOBTB3
381	MTERFD3
382	LOC100499466
383	KAT6B
384	ADH5
385	DLGAP4
386	PLEKHG2
387	PRKRA
388	LYSMD4
389	FAM20B
390	WASF1
391	ATN1
392	DDX50
393	ATRX
394	CWC27
395	TTC8
396	TTYH2
397	PHF20
398	EHBP1L1
399	UBE2G2
400	PPP1CA
401	NUDT6
402	HNRNPH3
403	PEX5
404	NOL9
405	ACTB
406	LMAN2
407	ANO6
408	MEIS2
409	DKK3
410	PDGFC
411	FLYWCH1
412	POGZ
413	NAV2
414	SRSF4
415	SLC25A39
416	ZFP1
417	MRFAP1
418	AHCTF1
419	ROCK1
420	RPS6KC1
421	DOCK11
422	TTL
423	KIAA1274
424	CDC73
425	GAS1
426	MBNL2
427	PRKACA
428	ZFR
429	TUBG2
430	GBP2
431	LOC100129361
432	ZNF512
433	PCGF6
434	MMD
435	USP11
436	RAB3GAP1
437	FAM92A1
438	DCAF10
439	PELO
440	TOX
441	C7orf41
442	CDK17
443	ARSB
444	YPEL5
445	STK3
446	MYH10
447	ZNF558
448	SLC25A23
449	IFT74
450	DCAF6
451	PPM1A
452	BACE1
453	SMAD2
454	NREP
455	BCL9
456	RNF146
457	ZNF251
458	2015-09-02
459	NADKD1
460	ZSCAN21
461	BC065231
462	HOXB2
463	SLC25A26
464	TMEM194A
465	SMU1
466	ARNT
467	SMAD4
468	CALM1
469	FN1
470	NID1
471	LZTFL1
472	GFPT2
473	MICAL3
474	VEGFB
475	DIS3L
476	AK128361
477	RRAGA
478	RERE
479	UVRAG
480	SMAD5
481	CALU
482	KIAA0947
483	HOOK3
484	MSANTD4
485	CUEDC1
486	C16orf48
487	CHD6
488	BDP1
489	TBC1D17
490	ATF7
491	HNRNPA3
492	KLHL26
493	BC040208
494	NIN
495	DM074112
496	AK057887
497	COPS2
498	MIB1
499	C6orf228
500	SPAG9
501	KCTD2
502	HIRIP3
503	ATXN2
504	TWISTNB
505	NAA30
506	CRIM1
507	CD81
508	RBMS1
509	SKAP2
510	ZNF358
511	C1orf172
512	PACS2
513	FBXW2
514	NCBP2
515	BMPR2
516	BCAP29
517	SHISA4
518	FAM217B
519	MLLT1
520	OLFML2A
521	ATAD1
522	ZDHHC12
523	EIF2C4
524	ZC3H14
525	PURB
526	HIAT1
527	TRMT5
528	ANKRD10
529	HSDL1
530	BRWD1
531	ZNF181
532	KPNA1
533	TCEAL1
534	ARHGEF9
535	PTPRS
536	PDK3
537	FAM198B
538	PCNP
539	CUL5
540	RTN4
541	SCARF2
542	CAMK1
543	BC019904
544	PRR24
545	LRIG1
546	KLHDC8B
547	ZNF187
548	CASP8AP2
549	RFC1
550	ERC1
551	FEM1B
552	PTPN21
